# Supplementary material for: Incident fluence dependent morphologies, photoluminescence and optical oxygen sensing properties of ZnO nanorods grown by pulsed laser deposition
Source: Royal Society of Chemistry journal article supplement (doi:10.1039/c4tc02924k), 2015-01-01
Supplement: c4tc02924k1.pdf [file c4tc02924k1.pdf]

## Supplementary information

### Incident Fluence dependent morphologies, photoluminescence and optical oxygen sensing properties of ZnO nanorods grown by pulsed laser deposition

*Xiao Liu, Ye Sun,\* Miao Yu,\* Yongqi Yin, Bin Yang, Wenwu Cao and Michael N. R. Ashfold\**

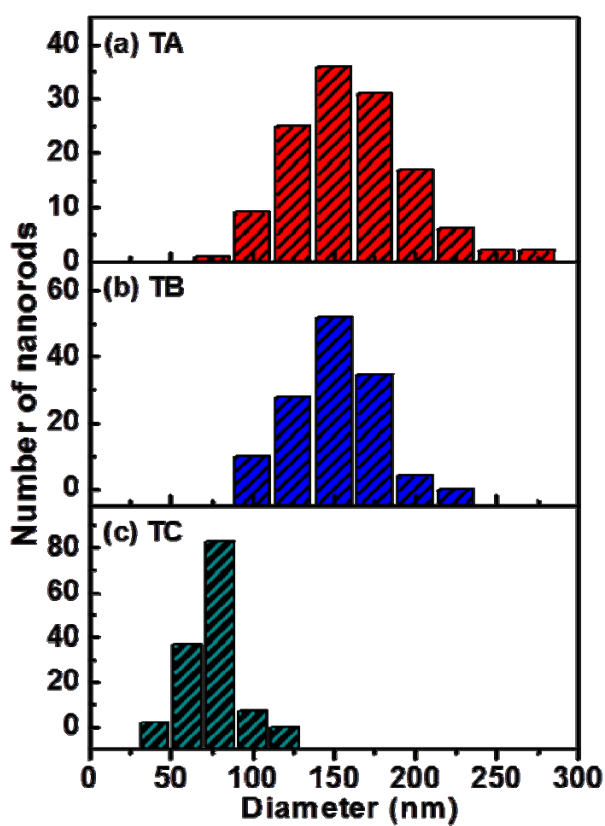

**Fig. S1** Diameter distribution of TA (a), TB (b) and TC (c) ZnO nanorods

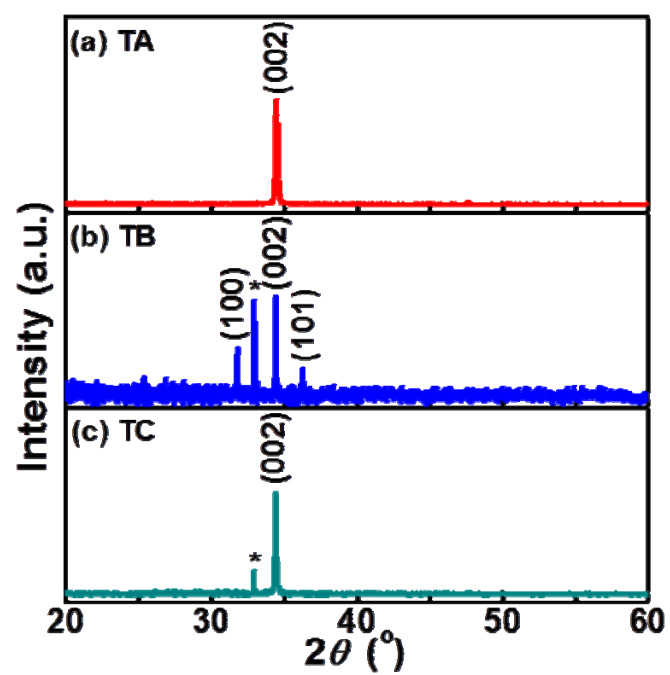

**Fig. S2** XRD patterns of TA (a), TB (b) and TC (c) samples. The peak marked with an asterisk in panels (b) and (c) is associated with the Si substrate.

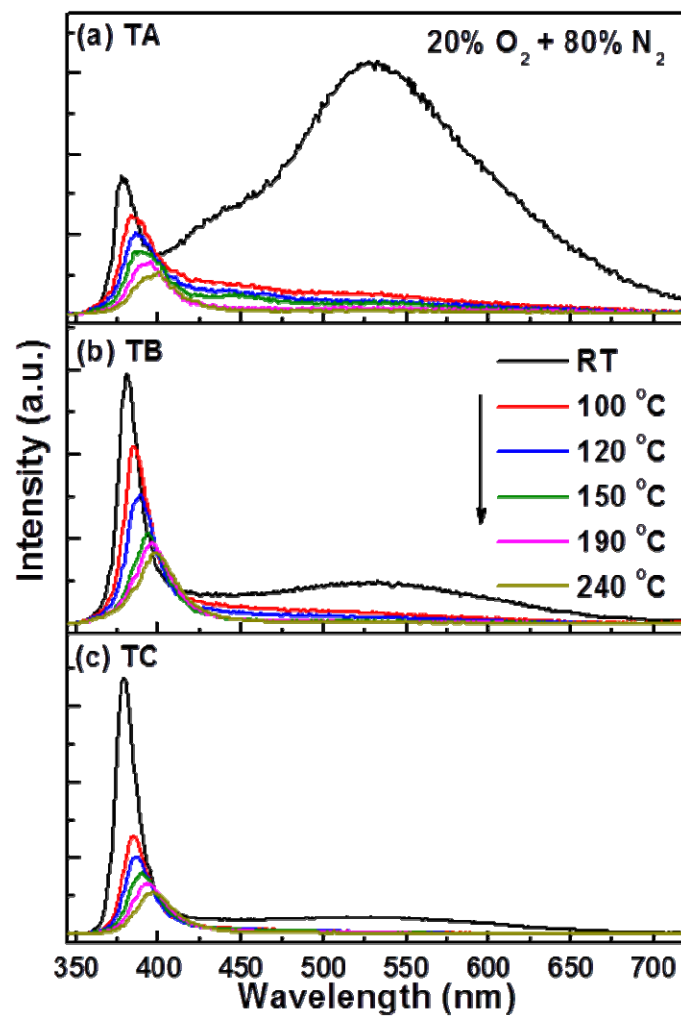

**Fig. S3** PL spectra of TA (a), TB (b) and TC (c) ZnO nanorods in a 20% O<sub>2</sub> / 80% N<sub>2</sub> gas mixture at several temperatures in the range  $RT \leq T_{NR} \leq 240^{\circ}\text{C}$

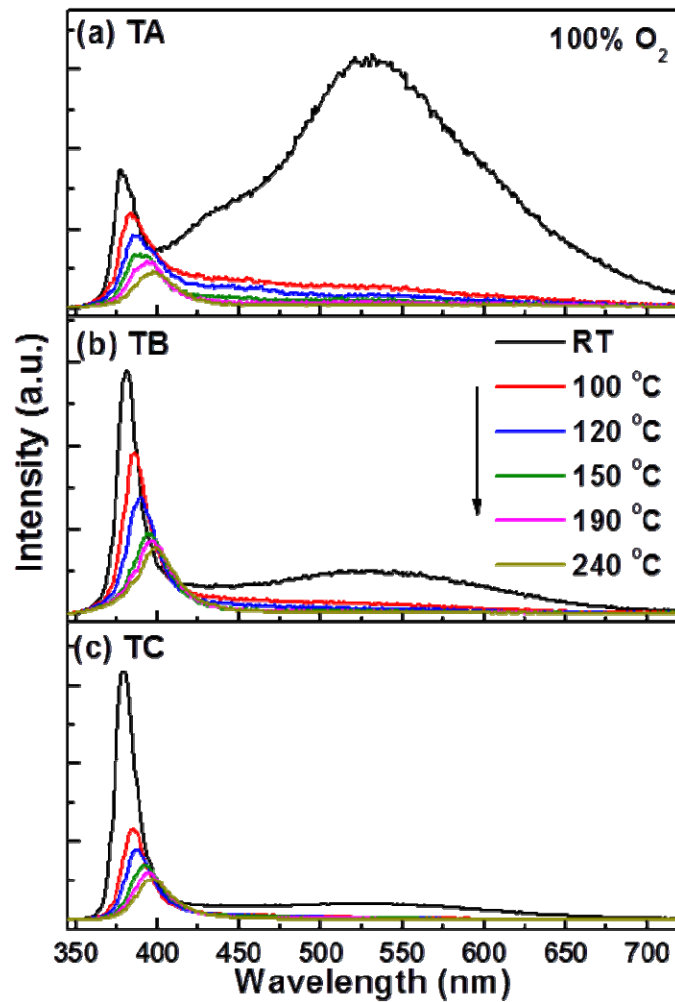

**Fig. S4** PL spectra of TA (a), TB (b) and TC (c) ZnO nanorods in 100% O<sub>2</sub> at several temperatures in the range  $RT \leq T_{NR} \leq 240^{\circ}\text{C}$ .

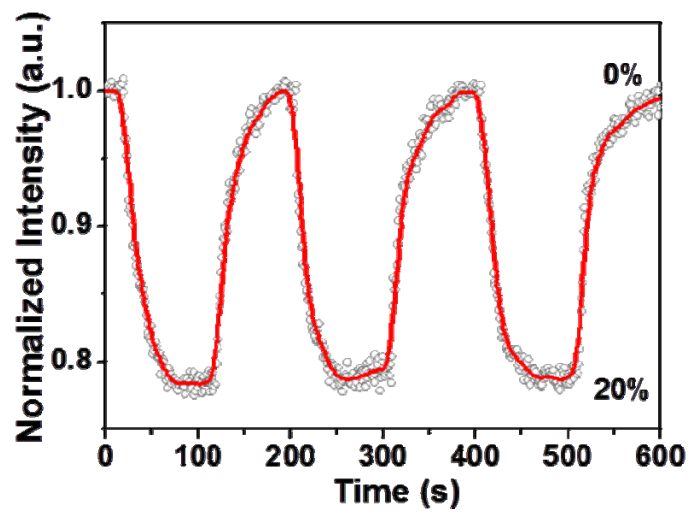

Fig. S5 The dynamic  $I_{UV}$  response of the TC nanorods to a 20%  $O_2$  / 80%  $N_2$  gas mixture at  $T_{NR} = 150^\circ C$

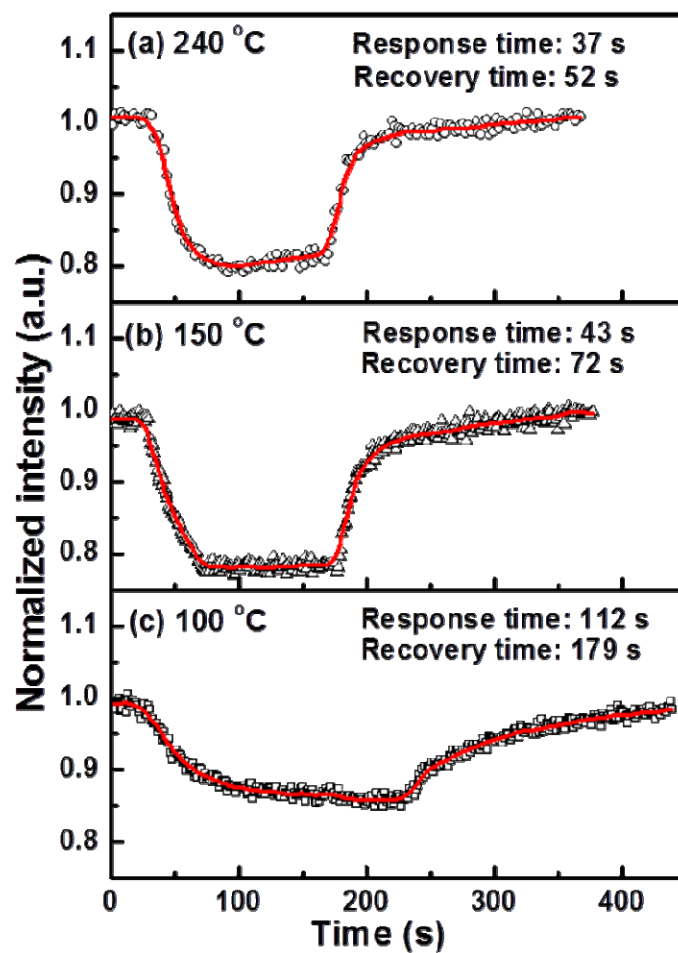

Fig. S6 The transient  $I_{UV}$  response of the TC nanorods to a 20% O<sub>2</sub>/80% N<sub>2</sub> gas mixture at  $T_{NR} = 240^{\circ}\text{C}$  (a),  $150^{\circ}\text{C}$  (b) and  $100^{\circ}\text{C}$  (c).
